# Supplementary material for: Controlled dispersion of ZnO nanoparticles produced by basic precipitation in solvothermal processes
Source: PubMed Central journal article supplement — Heliyon. 2020 Dec 29;6(12):e05821. doi: 10.1016/j.heliyon.2020.e05821 (PMC7779710; doi:10.1016/j.heliyon.2020.e05821), 2020-12-29
Supplement: mmc1.pdf [file mmc1.pdf]

## SUPPLEMENTARY DATA

### Controlled dispersion of ZnO nanoparticles produced by basic precipitation in solvothermal processes

Daniel Navas<sup>a</sup>, Andrés Ibañez<sup>b</sup>, Iván González<sup>c</sup>, Juan Luis Palma<sup>d,e</sup>, Paulina Dreyse<sup>f,\*</sup>

<sup>a</sup>Departamento de Química, Facultad de Ciencias Naturales, Matemática y del Medio Ambiente, Universidad Tecnológica Metropolitana. Las Palmeras 3360, Ñuñoa, Santiago, Chile, 7800003.

<sup>b</sup>Departamento de Física, Facultad de Ciencias Físicas y Matemáticas, Universidad de Chile. Av. Beauchef 850, Santiago, Chile, Casilla 653.

<sup>c</sup>Facultad de Ciencias de la Salud, Universidad Central de Chile, Lord Cochrane 418, Santiago, Chile.

<sup>d</sup>Center for the Development of Nanoscience and Nanotechnology (CEDENNA), Santiago, Chile, 9170124.

<sup>e</sup>Engineering School, Universidad Central de Chile, Santa Isabel 1186, Santiago, Chile, 8330601.

<sup>f</sup>Departamento de Química, Universidad Técnica Federico Santa María, Av. España 1680, Valparaíso, Chile, Casilla 2390123. E-mail: [paulina.dreyse@usm.cl](mailto:paulina.dreyse@usm.cl)

#### S1. X-Ray diffraction of hydrozincite obtained from the synthesis II

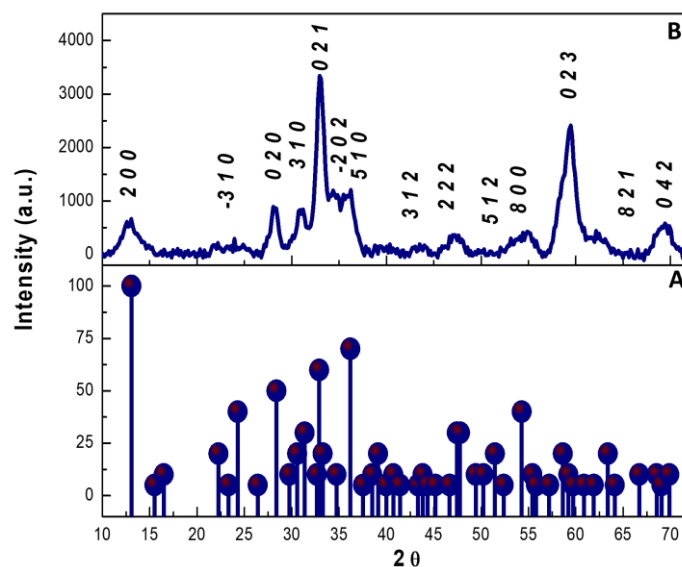

**Fig. S1.** X-Ray diffraction of **A.** Hydrozincite PDF 19-1458, **B.** Hydrozincite from synthesis II.

**S2.** X-Ray diffraction sequence of synthesis III with slightly excess of  $\text{CO}_3^{2-}$

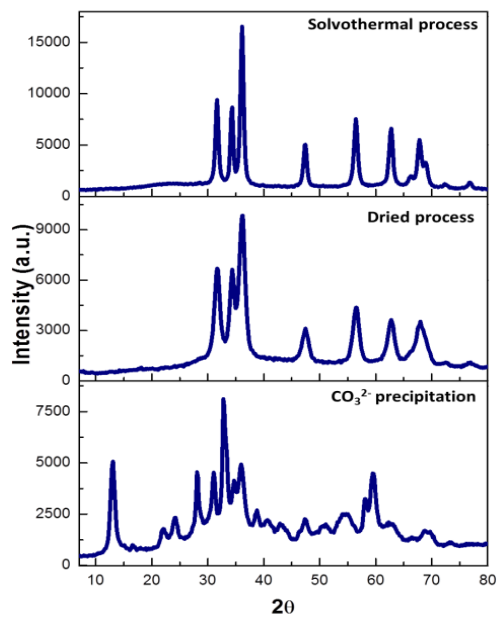

**Fig. S2.** X-Ray diffraction of synthesis III using slightly excess of  $\text{CO}_3^{2-}$ .

**S3.** FT-IR spectra of final ZnO obtained by three different synthetic routes

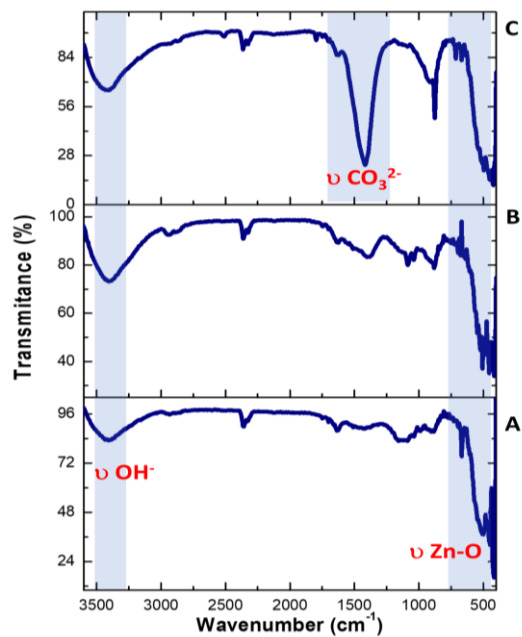

**Fig. S3.** FT-IR spectra of ZnO obtained after solvothermal treatment from synthesis: A. I, B. II and C. III.

#### S4. Kubelka – Munk transformed diffuse reflectance spectra of ZnO NPs.

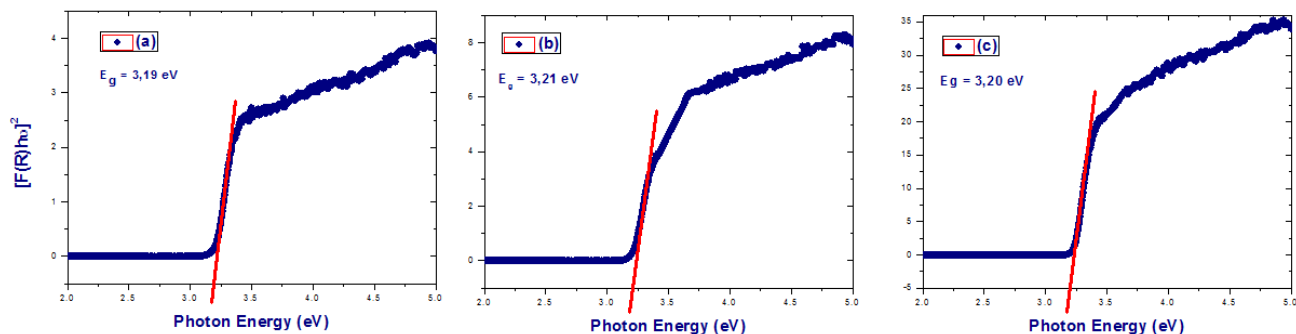

**Fig. S4.** Kubelka – Munk transformed reflectance spectra of ZnO NPs from synthesis: (a) I, (b) II and (c) III.

#### S5. TEM images from synthesis I previous solvothermal process

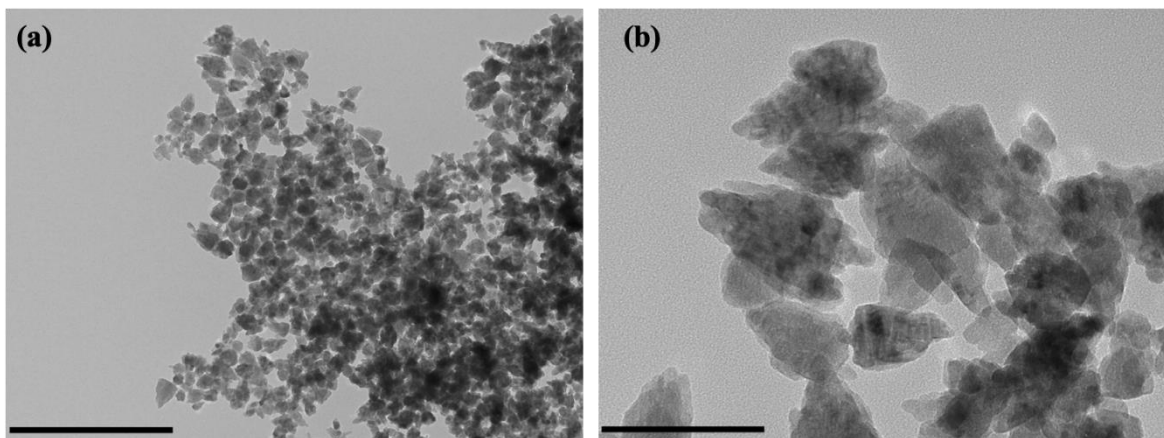

**Fig. S5.** TEM images from synthesis I. (a). Panoramic view and (b). details of nano/micro sizes without a defined morphology. Scale bars are 500 nm (a) and 100 nm (b).

### S6. Sequence of TEM images of ZnO NPs synthesis from synthesis III

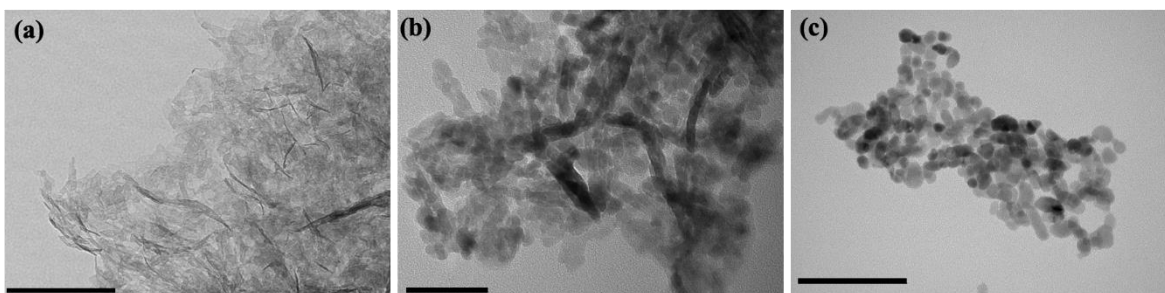

**Fig. S6.** Sequence of TEM images from ZnO-synthesis III. **(a)**, Hydrozincite ( $\text{CO}_3^{2-}$  precipitation), **(b)**, ZnO mix a nanorod/nanoparticle phase ( $220^\circ\text{C}$  drying process) and **(c)**, ZnO NPs from solvothermal treatment to  $200^\circ\text{C}$ . Scale bars are 20 nm **(a)**, 50 nm **(b)** and 100 nm **(b)**.

### S7. TEM images of ZnO structures from the synthesis I then of the ultrasonic treatments

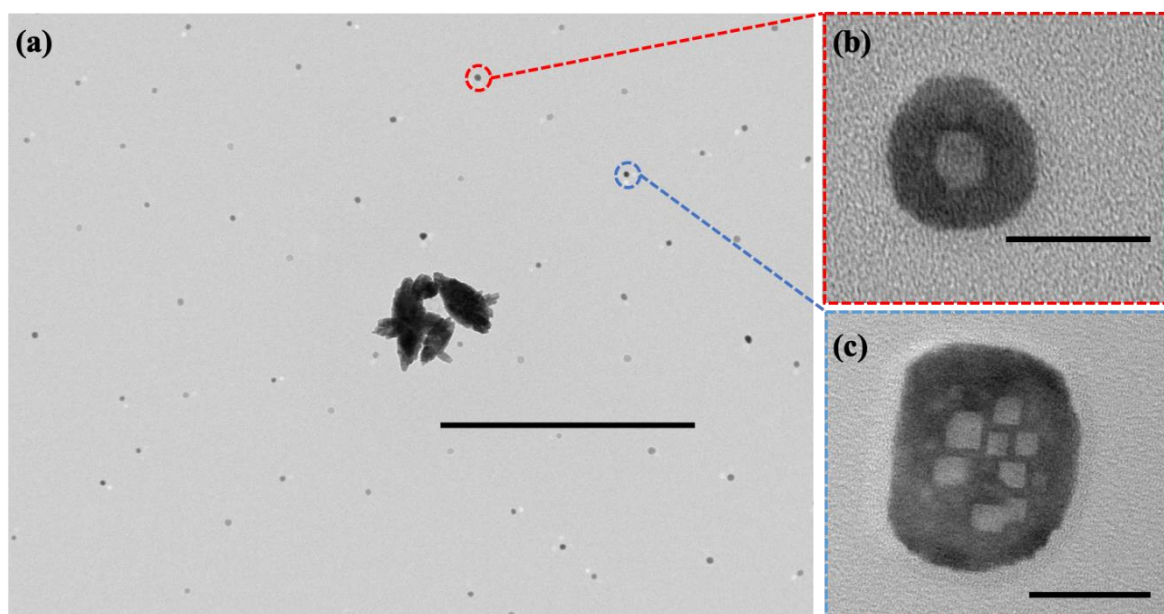

**Fig. S7.1.** TEM image of ZnO samples obtained from the synthesis I, treated with an ultrasound bath for 15 minutes. Scale bars are 100 nm **(a)** and 20 nm **(b-c)**.

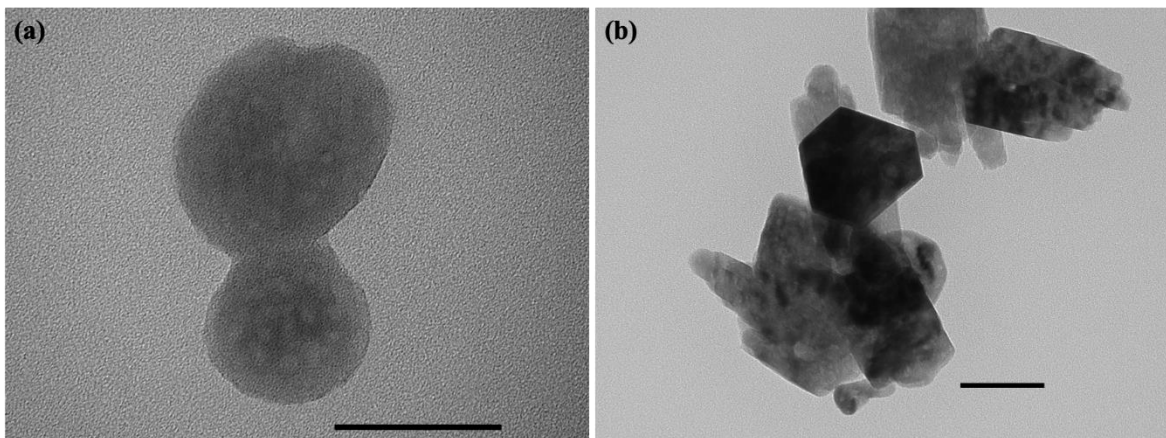

**Fig. S7.2** TEM image of ZnO samples obtained from the synthesis I, treated with an ultrasound bath for 30 (a) and 60 (b) minutes. Scale bar is 50 nm in both cases.

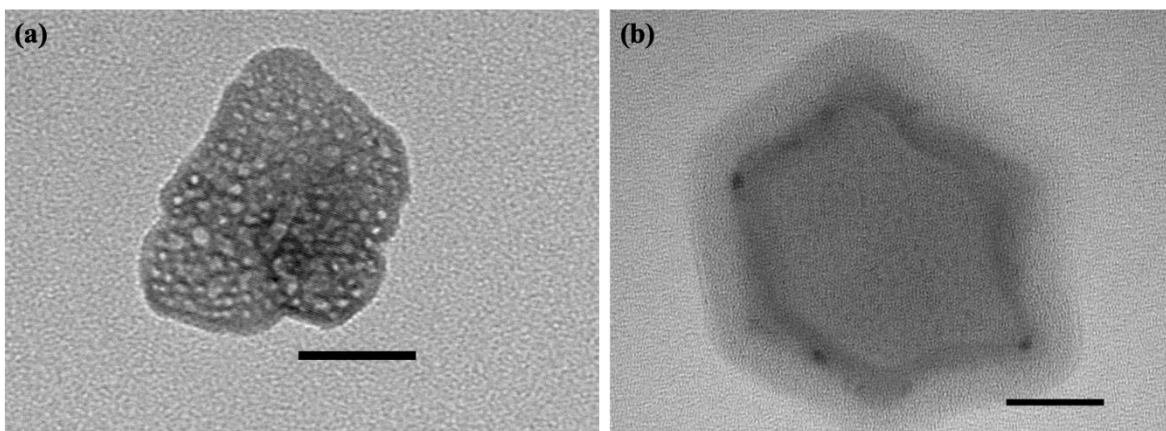

**Fig. S7.3.** TEM image of ZnO samples obtained from the synthesis I, treated with a probe ultrasonic for 60 (a) and 90 (b) minutes. Scale bars are 30 nm (a) and 20 nm (b).
